# Supplementary material for: Flavonoid Apigenin Is an Inhibitor of the NAD+ase CD38: Implications for Cellular NAD+ Metabolism, Protein Acetylation, and Treatment of Metabolic Syndrome
Source: PubMed Central journal article supplement — Diabetes. 2013 Mar 14;62(4):1084–93. doi: 10.2337/db12-1139 (PMC3609577; doi:10.2337/db12-1139), 2013-03-14

SUPPLEMENTARY DATA

**Supplementary Figure 1.** Human liver carcinoma cells (HepG2) were incubated with Vehicle (DMSO), apigenin (25  $\mu$ M) or apigenin + Nicotinamide (5 mM) for 4 hours. Cell lysates were immunoblotted for acetylated Lysine (left) to determine total protein acetylation levels. Cell lysates were also immunoblotted for Ac-p53 (K382), p53, CD38, and SIRT1 (right). Before the addition of apigenin, cells were incubated with the proteasome inhibitor MG132 (10  $\mu$ M) for 1 hour to stabilize the p53 protein. MG132 was maintained during the incubation with apigenin.

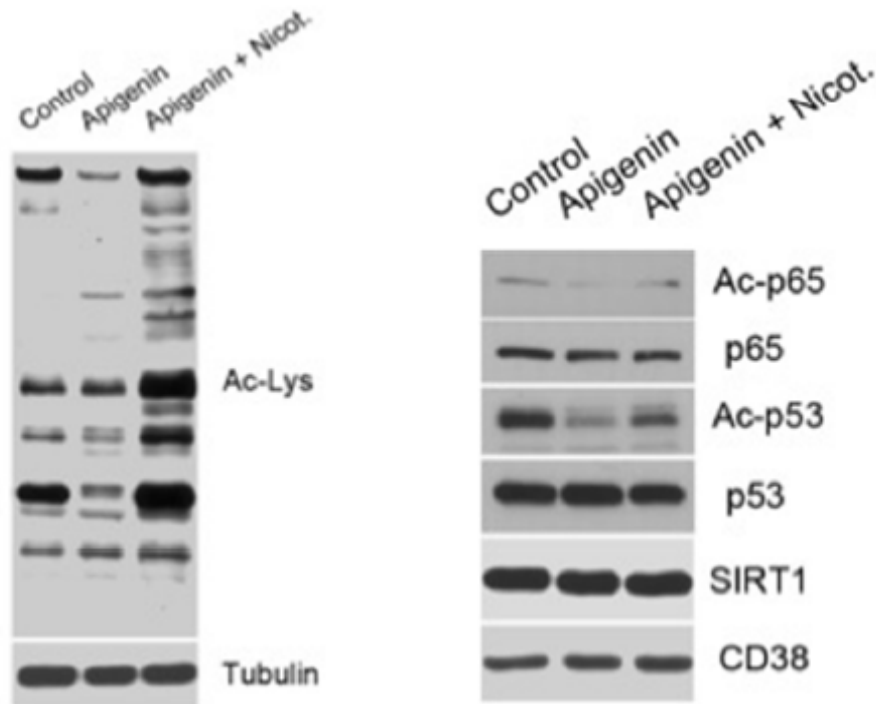

SUPPLEMENTARY DATA

**Supplementary Figure 2.** Survival of wild-type, CD38 knockout, and PARP1 knockout mice fed with a high-fat diet. A and B) Survival curves of in adult female mice fed with a high-fat diet. C) Comparison of median and maximal survival of CD38 and PARP1 knockout mice. For both calculations the numbers were obtained from the difference in survival between knockout mice with their respective wild-type controls.

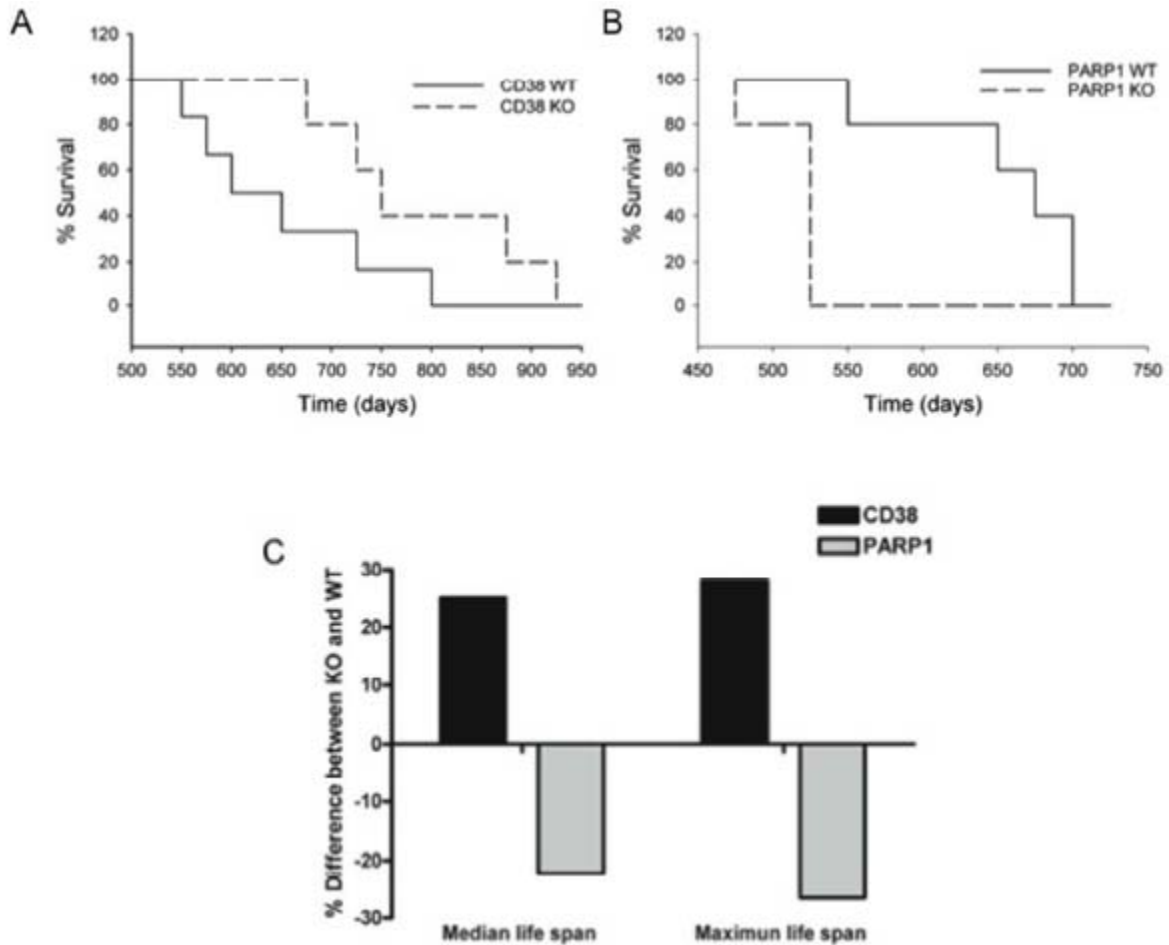

Supplement: supp_db12-1139_DB121139SupplementaryData.pdf [file supp_db12-1139_DB121139SupplementaryData.pdf]
